# Supplementary material
Source: PubMed Central journal article supplement (PMC3149366)
Supplement: supp_M111.248435_jbc.M111.248435-1.pdf [file supp_M111.248435_jbc.M111.248435-1.pdf]

***ANKRD26* GENE DISRUPTION ENHANCES ADIPOGENESIS OF MOUSE  
EMBRYONIC FIBROBLASTS**

**Zhaoliang Fei, Tapan K. Bera, Xiufen Liu, Laiman Xiang, Ira Pastan**

From the Laboratory of Molecular Biology, Center for Cancer Research, National Cancer Institute,  
National Institutes of Health, Bethesda, MD 20892-4264

Running title: Ankrd26 disruption enhanced adipogenesis

Address correspondence to: Ira Pastan, Laboratory of Molecular Biology, 37 Convent Drive, Room 5106,  
National Cancer Institute, Bethesda, MD 20892-4264; Tel: (301) 496-4797; Fax: (301) 402-1344; E-mail:  
[pastani@mail.nih.gov](mailto:pastani@mail.nih.gov).

**SUPPLEMENTAL MATERIAL**

**Supplemental Table 1. Primers used for real-time PCR**

| GENE            | DIRECTION | SEQUENCE                 |
|-----------------|-----------|--------------------------|
| ap2             | forward   | AACTCGCGGCCCAATCCTATCCTG |
|                 | reverse   | CTTTTGGCGCTGTTGTCCGTGTGG |
| C/EBP $\alpha$  | forward   | GGTGCGGGCAAAGCCAAGAAGT   |
|                 | reverse   | GCCCCGCAGCGTGTCCAGTT     |
| C/EBP $\beta$   | forward   | GGCGCGAGCGCAACAACATC     |
|                 | reverse   | GCTCGGGCAGCTGCTTGAACAA   |
| C/EBP $\delta$  | forward   | GCGCGAGCGCAACAACATC      |
|                 | reverse   | GCGCGTTACCGGCAGTCG       |
| CD24            | forward   | ATGCCGCTATTGAATCTGCTGGAG |
|                 | reverse   | TGCACTATGGCCTTATCGGTCAGA |
| CD29            | forward   | CAATGGCGTGTGCAGGTGTC     |
|                 | reverse   | ACGCCAAGGCAGGTCTGAC      |
| CD34            | forward   | ACCGTCGCAGTTGGAGCCCTACAG |
|                 | reverse   | TGCCCAACCAACCAATCACAGT   |
| GATA2           | forward   | GTAGCCCGGGGTGAGGACAAGGAT |
|                 | reverse   | GGCGGGCACATAGGAGGGATAGGT |
| KLF15           | forward   | CCAGCCGGCAGCCATAACCACA   |
|                 | reverse   | ATACCTCCACTGCCACCACCACTG |
| KLF5            | forward   | ATCTCACCCACCTCCGTCCTATG  |
|                 | reverse   | CGCTTCTCCAGATCCGGGTTACTC |
| Krox20          | forward   | TCGGCAGAAGGAACGGAAGAGCA  |
|                 | reverse   | CTGGGGCCTGGAGAAACTGGTGT  |
| PPAR $\gamma$ 2 | forward   | TGCCTTGCTGTGGGGATGTCTC   |
|                 | reverse   | CCTCGCCTTGGCTTTGGTCAG    |
| Pref-1          | forward   | AGCCCTCCTGCGCGTCCTCTT    |
|                 | reverse   | GAATTTCCCGTCCCAGCCATCCTT |
| Sca-1           | forward   | CTCCGGGCGGGCGACATCT      |
|                 | reverse   | CCCATACTCCGGCTTTTCTCC    |
| $\beta$ -actin  | forward   | ACTTGCGGTGCACGATGGA      |
|                 | reverse   | TACCCAGGCATTGCTGACAGG    |

## Supplemental Figure 1

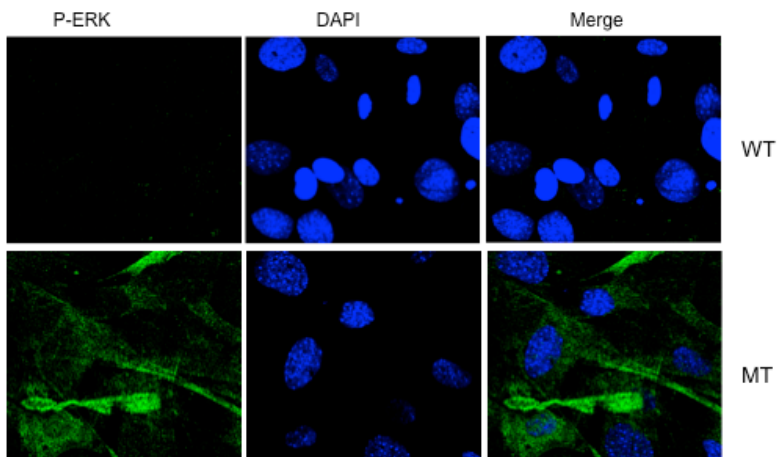

MEF cells of wild type (WT) or mutant (MT) were grown on cover slips under regular culture conditions for 10 days post-confluence. The cells were fixed and stained with anti-p-Erk antibody (green) and co-stained with DAPI (blue). Representative images were shown after confocal microscopy analysis.
